# Supplementary figures and images for: Downregulation of AHNAK2 inhibits cell cycle of lung adenocarcinoma cells by interacting with RUVBL1
Source: PubMed Central journal article supplement — Thorac Cancer. 2023 Jun 22;14(22):2093–104. doi: 10.1111/1759-7714.14989 (PMC10396786; doi:10.1111/1759-7714.14989), 2023-06-22

S1

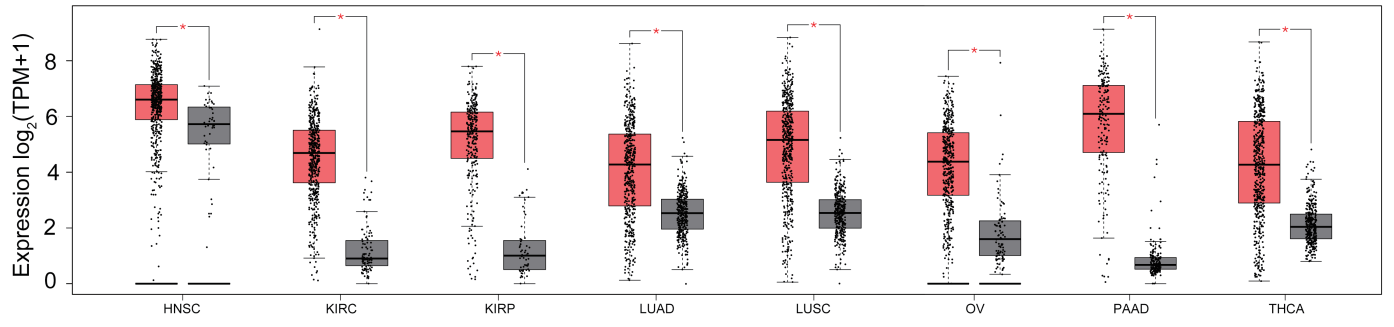

Supplement: TCA-14-2093-s001.pdf [file TCA-14-2093-s001.pdf]

**A**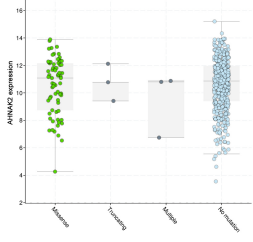**B**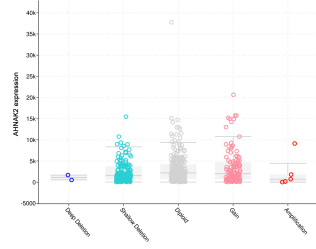**C**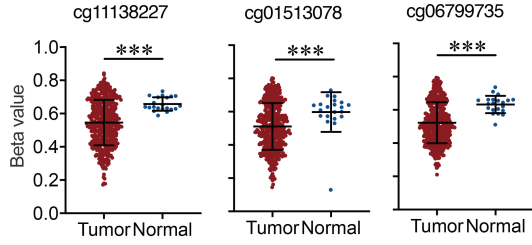**D**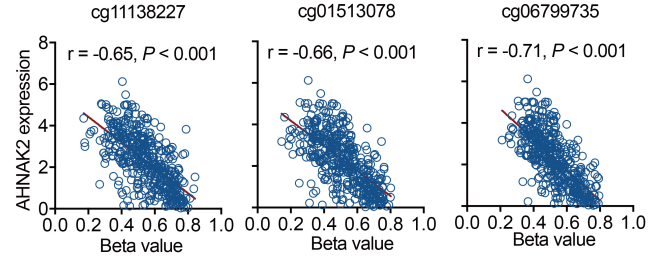

Supplement: TCA-14-2093-s002.pdf [file TCA-14-2093-s002.pdf]
